# Supplementary material for: Development of a food-based index of dietary inflammatory potential for Koreans and its relationship with metabolic syndrome
Source: PubMed Central journal article supplement — Nutr Res Pract. 2019 Mar 22;13(2):150–8. doi: 10.4162/nrp.2019.13.2.150 (PMC6449546; doi:10.4162/nrp.2019.13.2.150), 2019-03-22
Supplement: nrp-13-150-s001.pdf [file nrp-13-150-s001.pdf]

**Supplement 1.** Analysis of multiple regression between hs-CRP and food groups

| Food group                      | log hs-CRP |          |
|---------------------------------|------------|----------|
|                                 | $\beta$    | <i>P</i> |
| Mixed coffee · sweetened drinks | 0.00029    | < 0.001  |
| White rice                      | 0.00024    | < 0.001  |
| Green vegetables                | -0.00034   | < 0.001  |
| Eggs                            | -0.00063   | 0.003    |
| Citrus                          | -0.00032   | 0.003    |
| Legumes                         | -0.00027   | 0.002    |
| Red fruits                      | -0.00015   | 0.002    |
| Beef                            | 0.00040    | 0.004    |
| Bread · Wheat flour             | -0.00035   | 0.017    |
| Nuts · seeds                    | -0.00089   | 0.028    |

$R^2 = 0.068$ ,  $F = 3.896$ ,  $P = 0.048$
